# Supplementary material
Source: publisher figshare collection journal article supplement (https://acs.figshare.com/ndownloader/files/3963913)
Supplement: Supplementary file 1 [file 3963913]

## Supporting Information

### The role of *E. coli*-secretion and Melamine in Selective Formation of $\text{CaC}_2\text{O}_4 \cdot \text{H}_2\text{O}$ and $\text{CaC}_2\text{O}_4 \cdot 2\text{H}_2\text{O}$ Crystals

Zhenwu Zhao<sup>1†</sup>, Yiming Xia<sup>1†</sup>, Jingzhe Xue<sup>1</sup>, Qingsheng Wu<sup>1,2\*</sup>

<sup>1</sup>*Department of Chemistry, Tongji University; Key Laboratory of Yangtze River Water Environment, Ministry of Education, Shanghai 200092, PR China*

<sup>2</sup>*Shanghai Key Laboratory of Molecular Catalysis and Innovative Materials, Fudan University, Shanghai 200433, PR China*

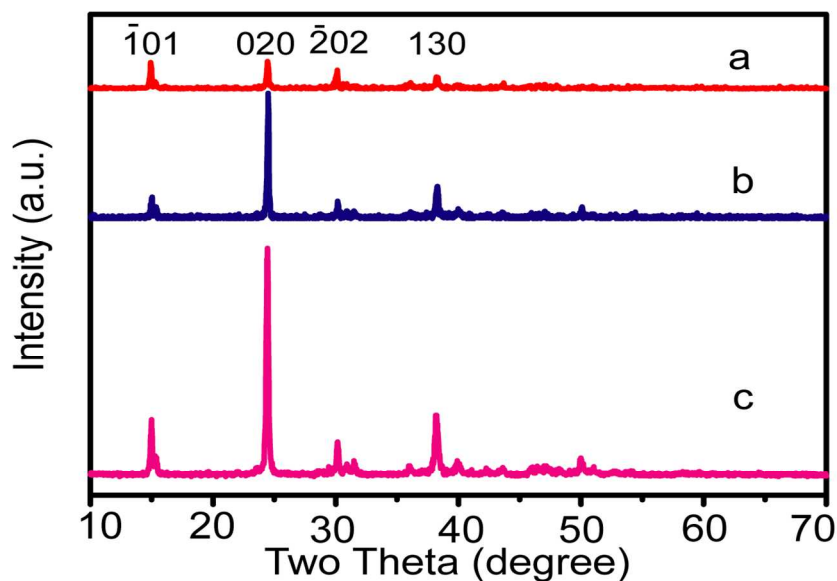

**Figure S1.** XRD images of CaOxa precipitates obtained in aqueous solution (a-c), with

---

<sup>†</sup>These authors contributed equally to this work and should be considered co-first authors.

\* Corresponding author. Tel: +86 21 65982620, Fax: +86 21 65981097.

*E-mail address:* [qswu@tongji.edu.cn](mailto:qswu@tongji.edu.cn) (Q. Wu).

different  $[\text{Ca}^{2+}]/[\text{C}_2\text{O}_4^{2-}]$  ratios at 1/20, 1 and 20, respectively.

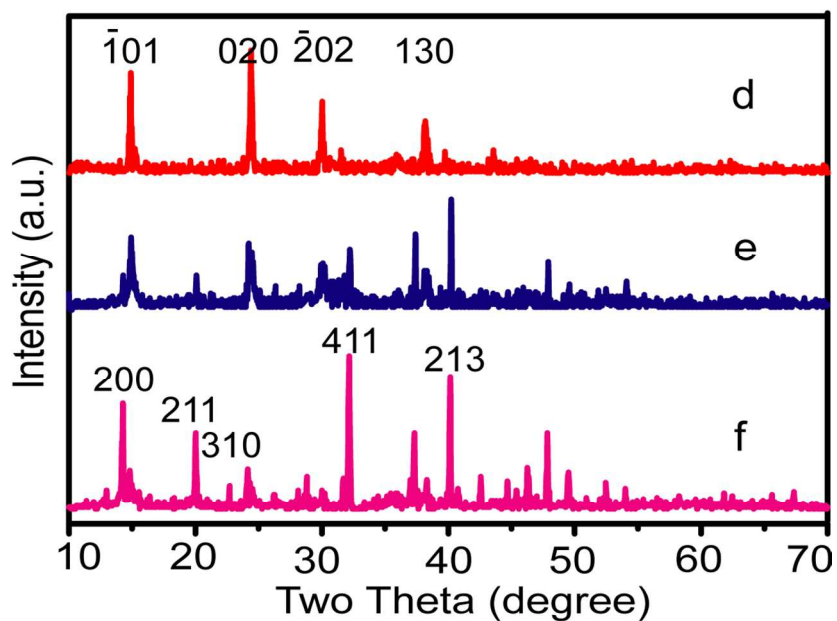

**Figure S2.** XRD images of CaOxa precipitates obtained (d-f) in 10 ml E. coli secretion with different  $[\text{Ca}^{2+}]/[\text{C}_2\text{O}_4^{2-}]$  ratios at 1/20, 1 and 20, respectively.

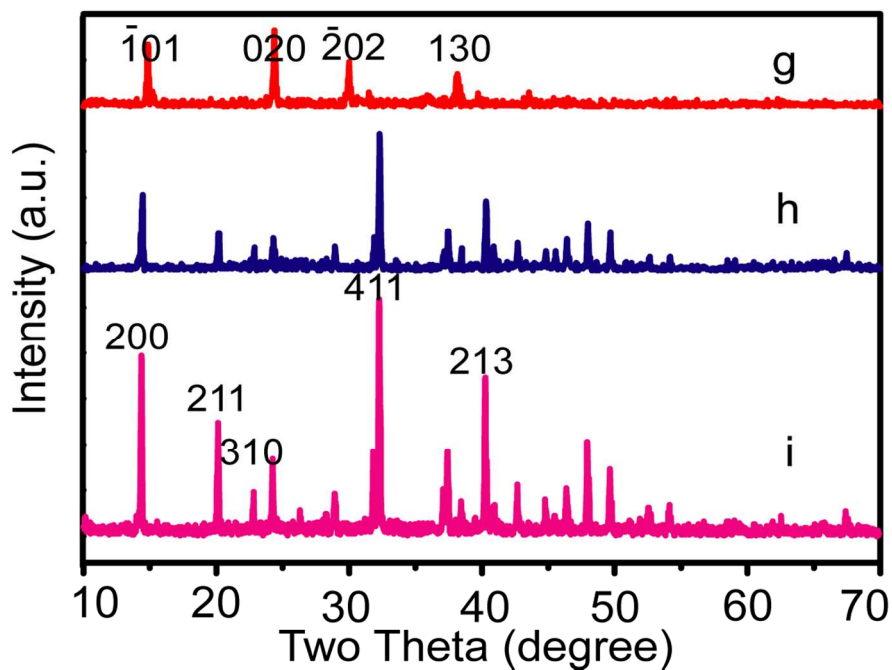

**Figure S3.** XRD images of CaOxa precipitates obtained in 10ml LB medium (g-i), with

different  $[\text{Ca}^{2+}]/[\text{C}_2\text{O}_4^{2-}]$  ratios at 1/20, 1 and 20, respectively.

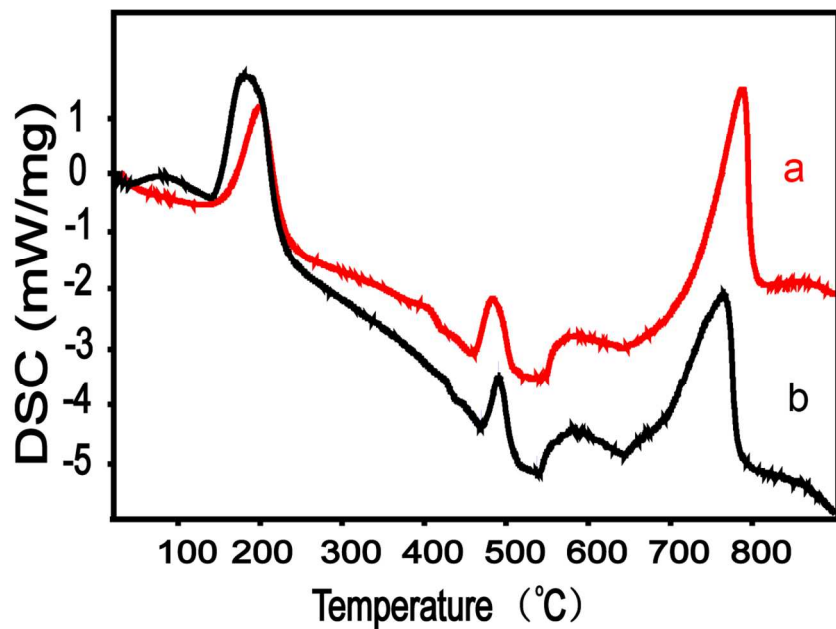

**Figure S4.** DSC curves of COM (a) and COD (b) under air sweeping

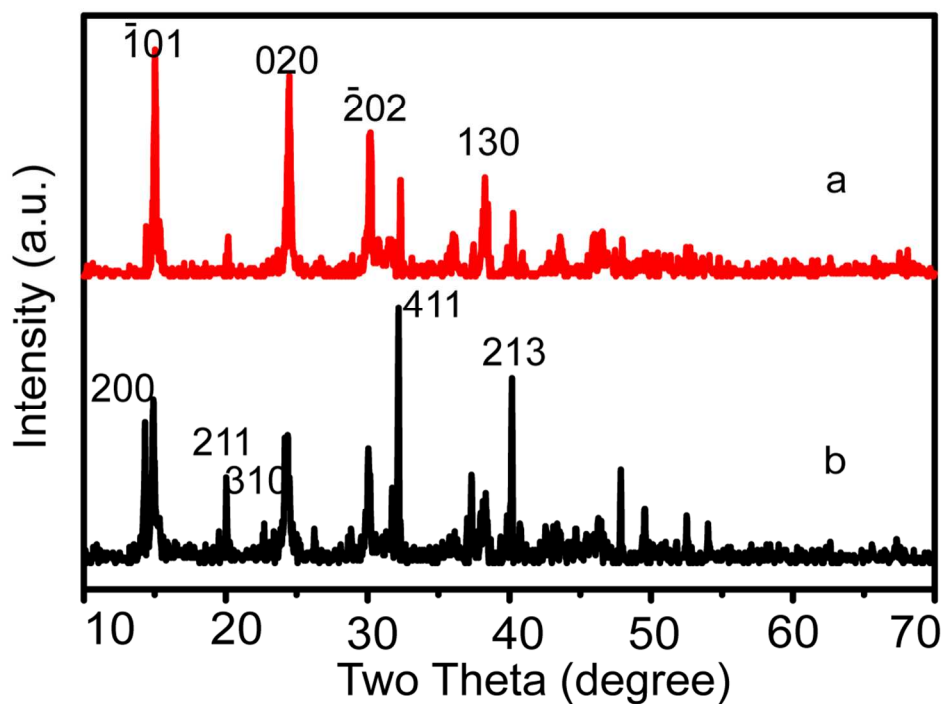

**Figure S5.** XRD images of samples without (a) and with (b) *E. coli* secretion under air sweeping

artificial urine circumstance.

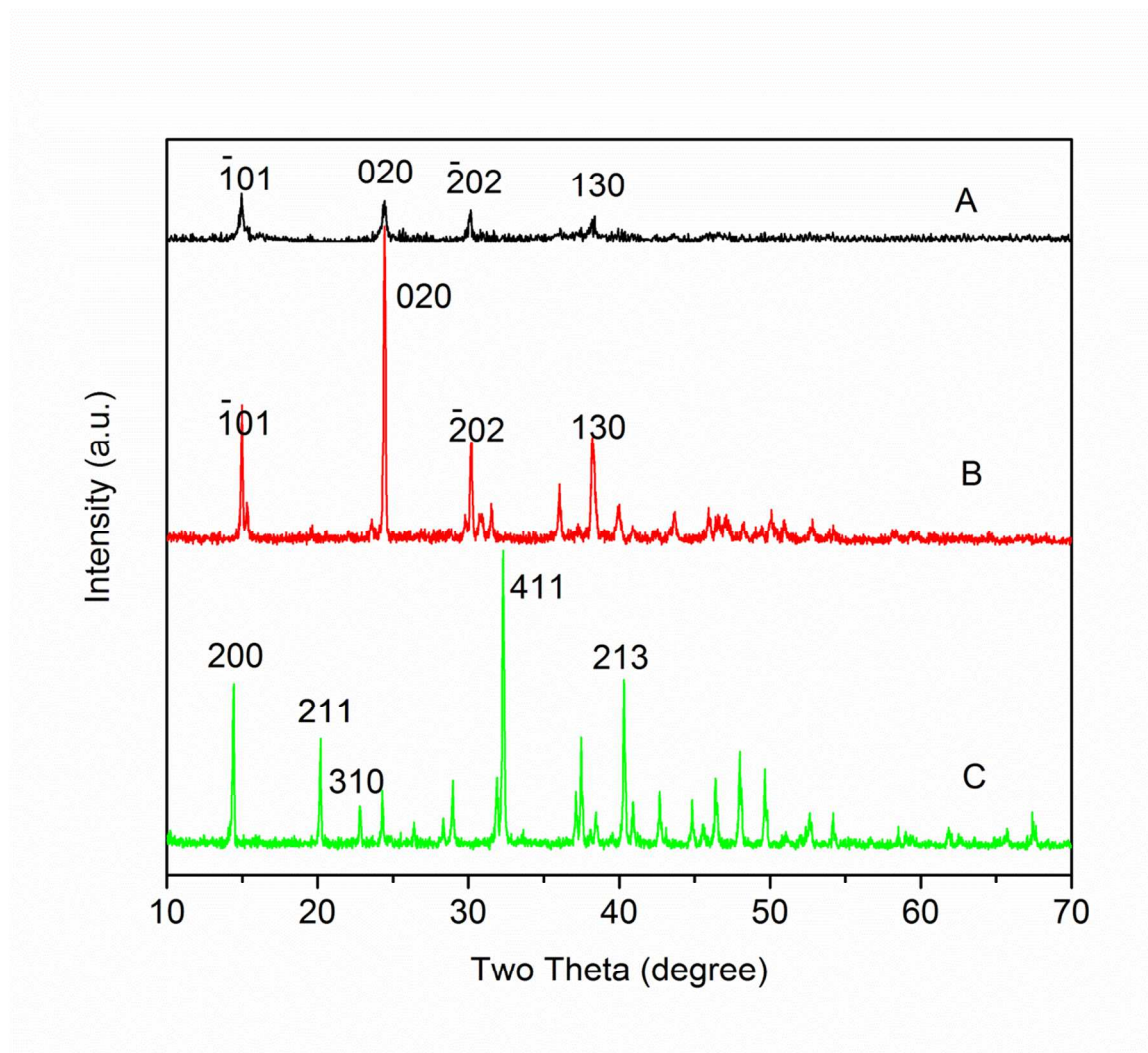

**Figure S6.** XRD images of CaOxa precipitates obtained with  $[\text{Ca}^{2+}]/[\text{C}_2\text{O}_4^{2-}]$  ratios 1:1 in three systems: (A) with *E. coli* precipitate; (B) with 10 ml *E. coli* solution; (C) with 10ml *E. coli*-secretion.
